# Supplementary material for: The Changes in the p53 Protein across the Animal Kingdom Point to Its Involvement in Longevity
Source: MDPI journal article supplement (doi:10.3390/ijms22168512), 2021-08-07
Supplement: s1 [file s1]

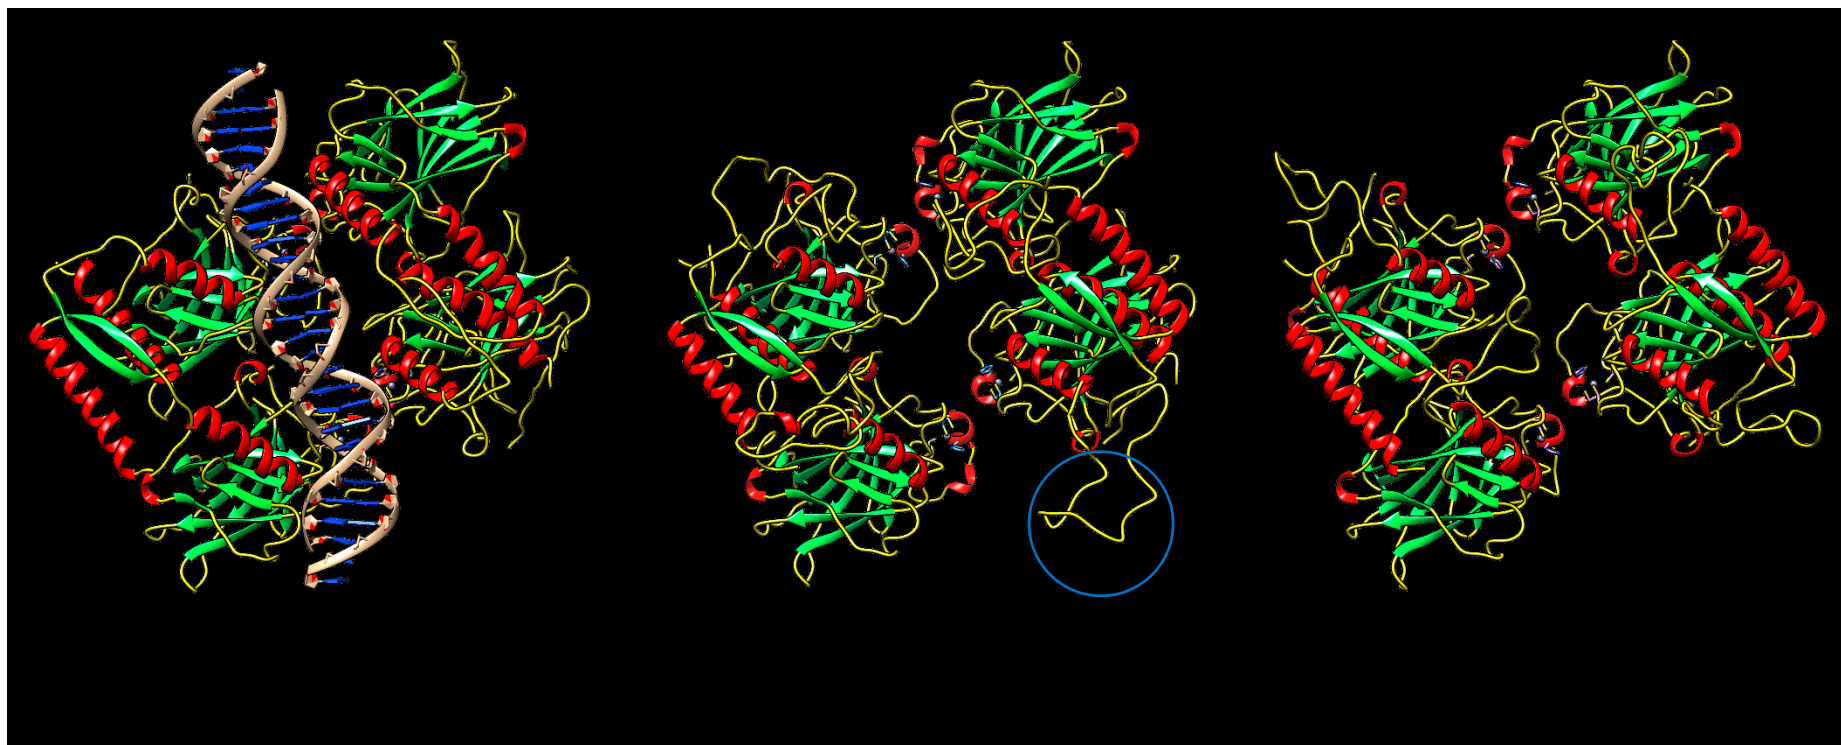

**Supplementary material 2:** Experimental (human) and modelled (bats) 3D structures of tetramerized p53 core domains. (Left) *Homo sapiens* p53 tetramer binding DNA (Middle) p53 tetramer from long-lived bat *Myotis Brandtii* (Right) p53 tetramer from short-lived bat *Phyllostomus discolor*. The insertion in the DNA binding domain of bats with long lifespan is present inside the DNA interaction cavity, suggesting decreased affinity of p53 for binding to DNA (blue circle).
