# Supplementary material for: The Changes in the p53 Protein across the Animal Kingdom Point to Its Involvement in Longevity
Source: Int J Mol Sci. 2021 Aug 7;22(16):8512. doi: 10.3390/ijms22168512 (PMC8395165; doi:10.3390/ijms22168512)
Supplement: Supplementary file 1 [file ijms-22-08512-s001.zip]

Archive with 6 entries (6 files):
- SM_01_all organisms lifespan and p53 sequences.xlsx
- SM_02_3D structures p53 tetramers.pdf
- SM_03_min_max.pdf
- SM_04_alignment signisite all.txt
- SM_05_transcriptome assemblies.zip
- SM_06_Modelled PDB structures.zip
