# Supplementary material for: The Changes in the p53 Protein across the Animal Kingdom Point to Its Involvement in Longevity
Source: Int J Mol Sci. 2021 Aug 7;22(16):8512. doi: 10.3390/ijms22168512 (PMC8395165; doi:10.3390/ijms22168512)
Supplement: Supplementary file 1 [file ijms-22-08512-s001.zip › SM_04_alignment signisite all.txt]

>NP_001119584 122.5
SSSVPSQKTYQGSYGFRLGFLHSGTAKSVTC-TYSPALNKMFCQLAKTCPVQLWVDSTPP
PGTRVRAMAIYKQSQHMTEVVRRCPHHERCSD-S----D------GL--APPQHLIRVEG
NLRVEYLDDRNTFRHSVVVPYEPPEVGSDCTTIHYNYMCNSSCMGGMNRRPILTIITLED
-SSGNLLGRNSFEVRVCACPGRDRRTEEENLRKK-----------
>XP_016786959 59.4
SSSVPSQKTYQGSYGFRLGFLHSGTAKSVTC-TYSPALNKMFCQLAKTCPVQLWVDSTPP
PGTRVRAMAIYKQSQHMTEVVRRCPHHERCSD-S----D------GL--APPQHLIRVEG
NLRVEYLDDRNTFRHSVVVPYEPPEVGSDCTTIHYNYMCNSSCMGGMNRRPILTIITLED
-SSGNLLGRNSFEVRVCACPGRDRRTEEENLRKK-----------
>XP_018868681 60.1
SSSVPSQKTYQGSYGFRLGFLHSGTAKSVTC-TYSPALNKMFCQLAKTCPVQLWVDSTPP
PGTRVRAMAIYKQSQHMTEVVRRCPHHERCSD-S----D------GL--APPQHLIRVEG
NLRVEYLDDRNTFRHSVVVPYEPPEVGSDCTTIHYNYMCNSSCMGGMNRRPILTIITLED
-SSGNLLGRNSFEVRVCACPGRDRRTEEENLRKK-----------
>XP_002827020 59
SSSVPSQKTYQGSYGFRLGFLHSGTAKSVTC-TYSPALNKMFCQLAKTCPVQLWVDSTPP
PGTRVRAMAIYKQSQHMTEVVRRCPHHERCSD-S----D------GL--APPQHLIRVEG
NLRVEYLDDRNTFRHSVVVPYEPPEVGSDCTTIHYNYMCNSSCMGGMNRRPILTIITLED
-SSGNLLGRNSFEVRVCACPGRDRRTEEENFRKK-----------
>XP_030656345 44.1
SSSVPSQKTYQGSYGFRLGFLHSGTAKSVTC-TYSPALNKMFCQLAKTCPVQLWVDSTPP
PGTRVRAMAIYKQSQHMTEVVRRCPHHERCSD-S----D------GL--APPQHLIRVEG
NLRVEYLDDRNTFRHSVVVPYEPPEVGSDCTTIHYNYMCNSSCMGGMNRRPILTIITLED
-SSGNLLGRNSFEVRVCACPGRDRRTEEENFHKK-----------
>XP_010360689 29.5
SSSVPSQKTYHGSYGFRLGFLHSGTAKSVTC-TYSPDLNKMFCQLAKTCPVQLWVDSTPP
PGSRVRAMAIYKQSQHMTEVVRRCPHHERCSD-S----D------GL--APPQHLIRVEG
NLRVEYSDDRNTFRHSVVVPYEPPEVGSDCTTIHYNYMCNSSCMGGMNRRPILTIITLED
-SSGNLLGRNSFEVRVCACPGRDRRTEEENYRKK-----------
>NP_001040616 40
SSSVPSQKTYHGSYGFRLGFLHSGTAKSVTC-TYSPDLNKMFCQLAKTCPVQLWVDSTPP
PGSRVRAMAIYKQSQHMTEVVRRCPHHERCSD-S----D------GL--APPQHLIRVEG
NLRVEYSDDRNTFRHSVVVPYEPPEVGSDCTTIHYNYMCNSSCMGGMNRRPILTIITLED
-SSGNLLGRNSFEVRVCACPGRDRRTEEENFRKK-----------
>XP_025219300 36
SSSVPSQKTYHGSYGFRLGFLHSGTAKSVTC-TYSPDLNKMFCQLAKTCPVQLWVDSTPP
PGSRVRAMAIYKQSQHMTEVVRRCPHHERCSD-S----D------GL--APPQHLIRVEG
NLRVEYSDDRNTFRHSVVVPYEPPEVGSDCTTIHYNYMCNSSCMGGMNRRPILTIITLED
SSSGNLLGRNSFEVRVCACPGRDRRTEEENFRKK-----------
>XP_011813948 35.3
SSSVPSQKTYHGSYGFRLGFLHSGTAKSVTC-TYSPDLNKMFCQLAKTCPVQLWVDSAPP
PGSRVRAMAIYKQSQHMTEVVRRCPHHERCSD-S----D------GL--APPQHLIRVEG
NLHVEYSDDRNTFRHSVVVPYEPPEVGSDCTTIHYNYMCNSSCMGGMNRRPILTIITLED
-SSGNLLGRNSFEVRVCACPGRDRRTEEENFRKK-----------
>XP_003929235 30.3
SSSVPSQKTYHGDYGFRLGFLHSGTAKSVTC-TYSPALNKMFCQLAKTCPVQLWVDSTPP
RGTRVRAMAIYKQSQHMTEVVRRCPHHERCSD-S----D------GL--APPQHLIRVEG
NLHVEYLDDKNTFRHSVVVPYEPPEVGSDCTTIHYNYMCNSSCMGGMNRRPILTIITLED
-SSGNLLGRNSFEVRVCACPGRDRRTEEENFRKK-----------
>XP_017387083 54
SSSVPSQKTYRGDYGFRLGFLHSGTAKSVTC-TYSPDLNKMFCQLAKTCPVQLWVDSTPP
RGTRVRAMAIYKQSQHMTEVVRRCPHHERCSD-S----D------GL--APPQHLIRVEG
NLHVEYLDDKNTFRHSVVVPYEPPEVGSDCTTIHYNYMCNSSCMGGMNRRPILTIITLED
-SSGNLLGRNSFEVRVCACPGRDRRTEEENFRKK-----------
>XP_008060532 16
SSSVPSQKTYHGNYGFRLGFLHSGTAKSVTC-TYSPALNKMFCQLAKTCPVQLWVDSTPP
PGTRVRAMAIYKQSQYMTEVVRRCPHHERCSD-S----D------GL--APPQHLIRVEG
NLRVEYLDDKTTFRHSVVVPYEPPEVGSDCTTIHYNYMCNSSCMGGMNRRPILTIITLED
-SSGNLLGRNSFEVRVCACPGRDRRTEEENFRKK-----------
>XP_015359919 17.4
SSSVPSQNTYPGVYGFRLGFLHSGTAKSVTC-TYSPSLNKLFCQLAKTCPVQLWVDSTPP
PGTRVRAMAIYKKSQHMTEVVRRCPHHERCSD-S----D------GL--APPQHLIRVEG
NLRAEYLDDRNTFRHSVVVPYEPPEVGSECTTIHYNYMCNSSCMGGMNRRPILTIITLED
-SSGNLLGRNSFEVRVCACPGRDRRTEEENFRKR-----------
>XP_005332876 7.9
SSSVPSQNTYPGVYGFRLGFIHSGTAKSVTC-TYSPSLNKLFCQLAKTCPVQLWVDSTPP
PGTRVRAMAIYKKSQHMTEVVRRCPHHERCSD-S----D------GL--APPQHLIRVEG
NLRAEYLDDRNTFRHSVVVPYEPPEVGSECTTIHYNYMCNSSCMGGMNRRPILTIITLED
-SSGNLLGRNSFEVRVCACPGRDRRTEEENFRKR-----------
>XP_012631512 18.2
SSSVPSQKTYPGNYGFRLGFLHSGTAKSVTC-TYSPALNKMFCQLAKTCPVQLWVDSTPP
PGSRIRAMAIYKQSQHMTEVVRRCPHHERCSD-S----D------GL--APSQHLIRVER
NLRVEYLDDRNTFRHSVVVPYEPPEVGSDCTTIHYNYMCNSSCMGGMNRRPIVTIITLED
-SNGIVLGRNSFEVRVCACPGRDRRTEEENFRKK-----------
>XP_017827813 22.8
SSSVPSQKTYHGDYGFRLGFLHSGTAKSVTC-TYSPALNKMFCQLAKTCPVQLWVDSTPP
RGTRVRAMAIYKQSQHMTEVVRRCPHHERCSD-S----D------GL--APPQHLIRVEG
NLHVEYLDDKNTFRHSVVVPYEPPEVGSDCTTIHYNYMCNSSCMGGMNRRPILTIITLED
-SSGNLLGRNSFEVRVCACPGRDRRTEEENFRKK-----------
>XP_005349834 5.3
SSSVPSQKTYQGEYGFRLGFLHSGTAKSVTC-TYSPSLNKLFCQLAKTCPVQLWVSSTPP
PGTRVRAMAIYKKSQHMTEVVRRCPHHERCSD-G----D------GL--APPQHLIRVEG
NLRAEYLDDRQTFRHSVVVPYEPPEVGSDCTTIHYNYMCNSSCMGGMNRRPILTIITLED
-PSGNLLGRNSFEVRVCACPGRDRRTEEENFRKK-----------
>XP_012661495 20
SSCVPSQTTYPGSYGFRLGFLNSGTAKSVTC-TYSPVLNKMFCQLAKTCPVQLWFDSTPP
PGSRIRAMAIYKQSQHMTEVVRRCPHHERCSE-S----D------GL--APPQHLIRVEG
NLRVEYLDDKNTFRHSVVVPYEPPEVGSDCTTIHYNYMCNSSCMGGMNRRPILTIITLED
-SSGNLLGRNSFEVRVCACPGRDRRTEEENSRKK-----------
>XP_007166447 50
SSFVPSQKTYPGSYGFRLGFLHSGTAKSVTC-TYSPALNKLFCQLAKTCPVQLWVSSPPP
PGTRVRAMAIYKKSEYMTEVVRRCPHHERCSDYS----D------GL--APPQHLIRVEG
NLRAEYLDDRHTFRHSVVVPYEPPEVGSDCTTIHYNFMCNSSCMGGMNRRPILTIITLED
-SSGNLLGRNSFEVRVCACPGRDRRTEEENFRKK-----------
>XP_006218839 25.8
SSFVPSQKTYPGSYGFRLGFLHSGTAKSVTC-TYSPPLNKLFCQLAKTCPVQLWVSSLPP
PGTRVRAMAIYKKSEYMTEVVRRCPHHERSSDYS----D------GL--APPQHLIRVEG
NLRAKYLDDRNTFRHSVVVPYEPPEVGSDCTTIHYNFMCNSSCMGGMNRRPILTIITLED
-ASGNLLGRNSFEVRVCACPGRDRRTEEENFRKK-----------
>XP_004684696 2.5
SSSVPCQKTYPGSYNFRLGFLQSGTAKSVTC-TYSPDLNKLFCQLAKTCPVQLWVSSPPP
PGTRVRAMAIYKKSEYMTEVVRRCPHHERNSD-N----D------GL--APPQHLIRVEG
NLHAKYLDDENTFRHSVVVPYELPEVGSDCTTIHYNFMCNSSCMGGMNRRPIVTIITLED
-SNGNLLGRSSFEVRVCACPGRDRRTEEENFRKK-----------
>XP_015855712 8.3
SSSVPSQKTYQGKYGFRLGFLHSGTAKSVTC-TYSLPLNKLFCQLAKTYPVQLWVSSTPP
PGTRVRAMAIYKKSQHMTEVVRRCPHHERCSD-G----D------GL--APPQHLIQVEG
NLRAEYLDDRQTFRHSVVVSYEPPEVGSDCTTIHYNYMCNSSCMGGMNRRPILTIITLED
-PSGNLLGRNSFEVRICACPGRDRRMEEENFRKK-----------
>XP_028725282 7.9
SSSVPSQKTYQGKYGFRLGFLHSGTAKSVTC-TYSPPLNKLFCQLAKTCPVQLWVSSTPP
PGTRVRAMAIYKKSQHMTEVVRRCPHHERCSD-G----D------GL--APPQHLIRVEG
NLRAEYLDDRQTFRHSVVVPYEPPEVGSDCTTIHYNYMCNSSCMGGMNRRPILTIITLED
-PSGNLLGRNSFEVRICACPGRDRRTEEENFRKK-----------
>XP_022451328 40
SSFVPSQKTYPGSYGFHLGFLHSGTAKSVTC-TYSPALNKLFCQLAKTCPVQLWVSSPPP
PGTRVRAMAIYKKSEYMTEVVRRCPHHERCSDYS----D------GL--APPQHLIRVEG
NLRAEYLDDRNTFRHSVVVPYEPPEVGSDCTTIHYNFMCNSSCMGGMNRRPILTIITLED
-SNGNLLGRNSFEVRVCACPGRDRRTEEENFHKK-----------
>XP_020007294 23.4
SSSVPSQKTYQGSYGFRLGFLHSGTAKSVTC-TYSPSLNKLFCQLAKTCPVQLWVDSTPP
PGTRVRAMAIYKKSQHMTEVVRRCPHHERCSD-S----D------GL--APPQHLIRVEG
NLRAEYLDDTHTFRHSVVVPYEPPEVGSDCTTIHYNFMCNSSCMGGMNRRPILTIITLED
-SNGNLLGRNSFEVRVCACPGRDRRTEEENFRKK-----------
>XP_004266944 90
SSFVPSQKTYPGSYGFRLGFLHSGTAKSVTC-TYSPPLNKLFCQLAKTCPVQLWVSSPPP
PGTRVRAMAIYKKSEYMTEVVRRCPHHERCSDYS----D------GL--APPQHLIRVEG
NLRAEYLDDRNTFRHSVVVPYEPPEVGSDCTTIHYNFMCNSSCMGGMNRRPILTIITLED
-SNGNLLGRNSFEVRVCACPGRDRRTEEENFRKK-----------
>NP_001297199 31
SSSVPSHKTYQGNYGFHLGFLQSGTAKSVTC-TYSPVLNKLFCQLAKTCPVQVWVESPPP
PGTRVRAMAIYKKSQHMTEVVRRCPHHERCSD-S----D------GL--APPQHLIRVEG
NLRAEYLDDRTTFRHSVVVPYDLPEVGSDCTTIHYNYMCNSSCMGGMNRRPILTIITLED
-SSGNLLGRNSFEVRVCACPGRDRRTEEENFHKK-----------
>XP_005399520 17.2
SSSVPSHKPYRGNYGFRLGFLQSGTAKSVTC-TYSPDLNKLFCQLAKTCPVQVWVESPPP
PGTRVRALAIYKKSQHMTEVVRRCPHHERCSD-S----D------GL--APPQHLIRVEG
NLHAEYLDDRTTFRHSVVVPYEPPEVGSDCTTIHYNYMCNSSCMGGMNRRPILTIITLED
-SSGKVLGRNSFEVRVCACPGRDRRTEEENFRKK-----------
>XP_026986728 46
SSFVPSQKTYPGSYGFRLGFLHSGTAKSVTC-TYSPPLNKLFCQLAKTCPVQLLVSSPPP
PGTRVRAMAIYKKSEYMTEVVRRCPHHERCSDYS----D------GL--APPQHLIRVEG
NLRAEYLDDRHTFRHSVVVPYEPPEVGSDCTTIHYNFMCNSSCMGGMNRRPILTIITLED
-SNGNLLGRNSFEVRVCACPGRDRRTEEENFRKK-----------
>XP_019799782 51.6
SSFVPSQKTYPGSYGFRLGFLHSGTAKSVTC-TYSPPLNKLFCQLAKTCPVQLLVSSPPP
PGTRVRAMAIYKKSEYMTEVVRRCPHHERCSDYS----D------GL--APPQHLIRVEG
NLRAEYLDDRHTFRHSVVVPYEPPEVGSDCTTIHYNFMCNSSCMGGMNRRPILTIITLED
-SNGNLLGRNSFEVRVCACPGRDRRTEEENFRKK-----------
>XP_002924483 36.8
SSSVPSPKTYPGTYGFRLGFLHSGTAKSVTC-TYSPSLNKLFCQLAKTCPVQLWVNSPPP
PDTCVRAMAIYKKSEFVTEVVRRCPHHERCSDSS----D------GL--APPQHLIRVEG
NLRAKYLDDRNTFRHSVVVPYEPPEVGSDCTTVHYNYMCNSSCMGGMNRRPILTIITLED
-SSGNVLGRSSFEVRVCACPGRDRRTEEENFRKK-----------
>NP_001166211 12
SSSVPSHKPYRGSYGFEVHFLKSGTAKSVTC-TYSPGLNKLFCQLAKTCPVQVWVESPPP
PGTRVRALAIYKKSQHMTEVVRRCPHHERCSD-S----D------GL--APPQHLIRVEG
NLHAEYVDDRTTFRHSVVVPYEPPEVGSDCTTIHYNYMCNSSCMGGMNRRPILTIITLED
-SSGKLLGRDSFEVRVCACPGRDRRTEEENFRKK-----------
>NP_001268590 3.9
SSSVPSYKTYQGDYGFRLGFLHSGTAKSVTC-TYSPSLNKLFCQLAKTCPVQLWVSSTPP
PGTRVRAMAIYKKLQYMTEVVRRCPHHERSSE-S----D------GL--APPQHLIRVEG
NMHAEYLDDKQTFRHSVVVPYEPPEVGSDCTTIHYNYMCNSSCMGGMNRRPILTIITLED
-PSGNLLGRNSFEVRICACPGRDRRTEEKNFQKK-----------
>XP_023507392 57
SSFVPSQKTYPGCYGFRLGFLNSGTAKSVTC-TYSPTLNKLFCQLAKTCPVQLLVSSPPP
PGTRVRAMAIYKKSEFMTEVVRRCPHHERCSDSS----D------GL--APPQHLIRVEG
NLRAEYLDDRNTFRHSVVVPYEPPEVGSDCTTIHYNFMCNSSCMGGMNRRPILTIITLED
-SSGNLLGRNSFEVRVCACPGRDRRTEEENFRKK-----------
>XP_004376078 69
SSSVPSQKTYPGTYGFRLGFLHSGTAKSVTC-TYSPDLNKLFCQLAKTCPVQLWVTSPPP
PGTRVRTMAIYKKSEHMTEVVKRCPHHERCSDYS----D------GL--APPQHLIRVEG
NLRAEYLEDSVTLRHSVVVPYEPPEVGSDCTTIHFNFMCNSSCMGGMNRRPILTIITLED
-SSGNLLGRNSFEVRICACPGRDRRTEEENFHKK-----------
>XP_004638481 14
SSSVPSHKPYHGNYGFRLGFLQSGTAKSVTC-TYSPDLNKLFCQLAKTCPVQVWVESPPP
PGTRVRALAIYKKSQHMTEVVRRCPHHERCSD-S----D------GL--APPQHLIRVEG
NLHAEYLDDRTTFRHSVVVPYEPPEVGSDCTTIHYNYMCNSSCMGGMNRRPILTIITLED
-SSGKLLGRNSFEVRVCACPGRDRRTEEENFRKK-----------
>NP_998989 27
SSFVPSQKTYPGSYDFRLGFLHSGTAKSVTC-TYSPALNKLFCQLAKTCPVQLWVSSPPP
PGTRVRAMAIYKKSEYMTEVVRRCPHHERSSDYS----D------GL--APPQHLIRVEG
NLRAEYLDDRNTFRHSVVVPYEPPEVGSDCTTIHYNFMCNSSCMGGMNRRPILTIITLED
-ASGNLLGRNSFEVRVCACPGRDRRTEEENFLKK-----------
>XP_014717043 47
SSFVPSQKTYPGCYGFRLGFLNSGTAKSVTC-TYSPTLNKLFCQLAKTCPVQLLVSSPPP
PGTRVRAMAIYKKSEFMTEVVRRCPHHERCSDSS----D------GL--APPQHLIRVEG
NLRAEYLDDRNTFRHSVVVPYEPPEVGSDCTTIHYNFMCNSSCMGGMNRRPILTIITLED
-SSGNLLGRNSFEVRVCACPGRDRRTEEENFRKK-----------
>XP_008686194 43.8
SSSVPSPKTYPGTYGFRLGFLHSGTAKSVTC-TYSPSLNKLFCQLAKTCPVQLWVNSPPP
PDTCVRAMAIYKKSEFVTEVVRRCPHHERCSDGS----D------GL--APPQHLIRVEG
NLRAKYLDDRNTFRHSVVVPYEPPEVGSDCTTVHYNYMCNSSCMGGMNRRPILTIITLED
-SSGNVLGRSSFEVRVCACPGRDRRTEEENFRKK-----------
>XP_014645038 45
SSFVPSQKTYPGCYGFRLGFLNSGTAKSVTC-TYSPALNKLFCQLAKTCPVQLWVSSPPP
TGTRVRAMAIYKKSEYMTEVVRRCPHHERCSDNN----D------GL--APPQHLIRVEG
NLHAKYVEDTNSFRHSVVVPYEPPEVGSDCTTIHYNFMCNSSCMGGMNRRPIVTIITLED
-SSGNLLGRNTFEVRVCACPGRDRRTEEENFRKK-----------
>XP_016010258 22.9
SSFVPSQKTYPGCYDFRLGFLNSGTAKSVTC-TYSPTLNKLFCQLAKTCPVQLWVSSPPP
LGARVRAMAIYKKSEHMTEVVRRCPHHERCSDYS----D------GL--APPQHLIRVEG
NLRAEYLDDKNTFRHSVVVPYEPPEVGSDCTTIHYNFMCNSSCMGGMNRRPILTIITLED
-SSGNLLGRNIFEVRVCACPGRDRRTEEENFQNK-----------
>XP_004669270 7.3
SSSVPSQKTYQGNYGFRLGFLHSGTAKSVTC-TYSPALNKLFCQLAKTCPVQLWVDSTPP
PGTRVRAMAIYKKSQHMTEVVRRCPHHERCSD-S----D------GL--APPQHLIRVEG
NLRAEYLDDRQTFRHSVVVPYEPPEVGSDCTTIHYNYMCNSSCMGGMNRRPILTIITLED
-PSGNLLGRNSFEVRVCACPGRDRRTEEENFRKK-----------
>XP_025861192 21.3
SSFVPSPKTYPGTYGFRLGFLHSGTAKSVTW-TYSPLLNKLFCQLAKTCPVQLWVSSPPP
PNTCVRAMAIYKKSEFVTEVVRRCPHHERCSDSS----D------GL--APPQHLIRVEG
NLRAKYLDDRNTFRHSVVVPYEPPEVGSDYTTIHYNYMCNSSCMGGMNRRPILTIITLED
-SSGNVLGRNSFEVRVCACPGRDRRTEEENFHKK-----------
>NP_001003210 24
SSSVPSPKTYPGTYGFRLGFLHSGTAKSVTW-TYSPLLNKLFCQLAKTCPVQLWVSSPPP
PNTCVRAMAIYKKSEFVTEVVRRCPHHERCSDSS----D------GL--APPQHLIRVEG
NLRAKYLDDRNTFRHSVVVPYEPPEVGSDYTTIHYNYMCNSSCMGGMNRRPILTIITLED
-SSGNVLGRNSFEVRVCACPGRDRRTEEENFHKK-----------
>NP_035770 4
SSFVPSQKTYQGNYGFHLGFLQSGTAKSVMC-TYSPPLNKLFCQLAKTCPVQLWVSATPP
AGSRVRAMAIYKKSQHMTEVVRRCPHHERCSD-G----D------GL--APPQHLIRVEG
NLYPEYLEDRQTFRHSVVVPYEPPEAGSEYTTIHYKYMCNSSCMGGMNRRPILTIITLED
-SSGNLLGRDSFEVRVCACPGRDRRTEEENFRKK-----------
>XP_005693587 20.8
SSFVPSQKTYPGNYGFRLGFLHSGTAKSVTC-TYSPSLNKLFCQLAKTCPVQLWVDSPPP
PGTRVRAMAIYKKLEHMTEVVRRCPHHERSSDYS----D------GL--APPQHLIRVEG
NLRAEYFDDRNTFRHSVVVPYESPEIESECTTIHYNFMCNSSCMGGMNRRPILTIITLED
-SRGNLLGRNSFEVRVCACPGRDRRTEEENFRKK-----------
>XP_004604915 3.2
SSFVPNQKIYPGSYGFRLGFLQSGTAKSVTC-TYSPTLNKLFCQLAKTCPVQLWVSSPPP
QGTRVRAMAIYKKSEYMTEVVRRCPHHERCSDYN----D------GL--APPQHLIRVEG
NLRAQYLDDENTFRHSVVVPYELPENDSDCTTIHYNFMCNSSCMGGMNRRPIVTIITLED
-SSGNLLGRSSFEVRVCACPGRDRRTEEDNFHKK-----------
>XP_011357166 20.9
SSFVPSQKTYPGSYDFRLGFLNSGTAKSVTC-TYSPTLNKLFCQLAKTCPVQLWVSSPPP
LGTRVRAMAIYKKSEYMTEVVRRCPHHERCSDYS----D------GL--APPQHLIRVEG
NLRAEYLDDKHTFRHSVVVPYEPPEVGSDCTTIHYNFMCNSSCMGGMNRRPILTIITLED
-SSGNLLGRNSFEVRVCACPGRDRRTEEENFRKK-----------
>NP_001009403 22.8
SSFVPSQKTYPGNYGFRLGFLHSGTAKSVTC-TYSPSLNKLFCQLAKTCPVQLWVDSPPP
PGTRVRAMAIYKKLEHMTEVVRRSPHHERSSDYS----D------GL--APPQHLIRVEG
NLRAEYFDDRNTFRHSVVVPYESPEIESECTTIHYNFMCNSSCMGGMNRRPILTIITLED
-SRGNLLGRSSFEVRVCACPGRDRRTEEENFRKK-----------
>NP_001277773 34.9
SSFVPSQKTYPGNYGFRLGFLHSGTAKSVTC-TYSPSLNKLFCQLAKTCPVQLWVDSPPP
PGTRVRAMAIYKKLEHMTEVVRRCPHHERSSDYS----D------GL--APPQHLIRVEG
NLRAEYLDDRNTFRHSVVVPYESPEIDSECTTIHYNFMCNSSCMGGMNRRPILTIITLED
-SCGNLLGRNSFEVRVCACPGRDRRTEEENFRKK-----------
>XP_019269113 27.3
SSFVPSQKTYPGAYGFHLGFLQSGTAKSVTC-TYSPPLNKLFCQLAKTCPVQLWVRSPPP
PGTCVRAMAIYKKSEFMTEVVRRCPHHERCPDSS----D------GL--APPQHLIRVEG
NLHAKYLDDRNTFRHSVVVPYEPPEVGSDCTTIHYNFMCNSSCMGGMNRRPIITIITLED
-SNGKLLGRNSFEVRVCACPGRDRRTEEENFRKK-----------
>NP_112251 3.8
SSSVPSQKTYQGNYGFHLGFLQSGTAKSVMC-TYSISLNKLFCQLAKTCPVQLWVTSTPP
PGTRVRAMAIYKKSQHMTEVVRRCPHHERCSD-G----D------GL--APPQHLIRVEG
NPYAEYLDDRQTFRHSVVVPYEPPEVGSDYTTIHYKYMCNSSCMGGMNRRPILTIITLED
-SSGNLLGRDSFEVRVCACPGRDRRTEEENFRKK-----------
>XP_006922397 19.7
SSFVPSQKTYPGSYDFRLGFLNSGTAKSVTC-TYSPTLNKLFCQLAKTCPVQLWVSSPPP
LGTRVRAMAIYKKSEYMTEVVRRCPHHERCSDYS----D------GL--APPQHLIRVEG
NLRAEYLDDKHTFRHSVVVPYEPPEVGSDCTTIHYNFMCNSSCMGGMNRRPILTIITLED
-SSGNLLGRNSFEVRVCACPGRDRRTEEENFHKK-----------
>XP_027481715 35.7
SSFVPSPKTYPGTYGFRLGFLHSGTAKSVTC-TYSPSLNKLFCQLAKTCPVQLWVSSPPP
PDTCVRAMAIYKKSEFVTEVVRRCPHHERCLDNS----D------GL--APPQHLIRVEG
NLRAKYLDDRNTFRHSVVVPYEPPEVGSDCTTVHYNYMCNSSCMGGMNRRPILTIITLED
-SSGNVLGRSSFEVRVCACPGRDRRTEEENFRKK-----------
>XP_030717425 60
SSFVPSQKTYPGSYGFRLGFLHSGTAKSVTC-TYSPPLNKLFCQLAKTCPVQLLVSSPPP
PGTRVRAMAIYKKSEYMTEVVRRCPHHERCSDYS----D------GL--APPQHLIRVEG
NLRAEYLDDRNTFRHSVVVPYEPPEVGSDCTTIHYNFMCNSSCMGGMNRRPILTIITLED
-SNGNLLGRNSFEVRVCACPGRDRRTEEENFRKK-----------
>XP_030151376 26.8
SSFVPSQKTYPGAYGFHLGFLQSGTAKSVTC-TYSPPLNKLFCQLAKTCPVQLWVRSPPP
PGTCVRAMAIYKKSEFMTEVVRRCPHHERCPDSS----D------GL--APPQHLIRVEG
NLHAKYLDDRNTFRHSVVVPYEPPEVGSDCTTIHYNFMCNSSCMGGMNRRPIITIITLED
-SNGKLLGRNSFEVRVCACPGRDRRTEEENFRKK-----------
>XP_003416950 65
SSSVPSQKTYPGTYGFRLGFLHSGTAKSVTC-TYSPDLNKLFCQLAKTCPVQLWVASPPP
PGTRVRTMAIYKKSEHMTEVVKRCPHHERCSDSS----D------GL--APPQHLIRVEG
NLRAEYLEDSITLRHSVVVPYEPPEVGSDCTTIHFNFMCNSSCMGGMNRRPILTIITLED
-SSGNLLGRNSFEVRICACPGRDRRTEEENFHKK-----------
>XP_029783014 20.6
SSFVPSQKTYPGAYGFHLGFLQSGTAKSVTC-TYSPCLNKLFCQLAKTCPVQLWVSSPPP
PGTCVRAMAIYKKSEFMTEVVRRCPHHERCPDSS----D------GL--APPQHLIRVEG
NLHAKYLDDRNTFRHSVVVPYEPPEVGSDCTTIHYNFMCNSSCMGGMNRRPIITIITLED
-SNGKLLGRSSFEVRVCACPGRDRRTEEENFRKK-----------
>XP_020724686 23
SSFIPSQKTYPGNYGFRLGFLHSGTAKSVTC-TYSPSLNKLFCQLAKTCPVQLWVDLPPP
PGTRVRAMAVYKKSEHMTEVVRRCPHHER-SDYS----D------GL--APPQHLIRVEG
NLRAEYLDDRNTFRHSVVVPYEPPEIASECTTIHYNFMCNSSCMGGMNRRPILTIITLED
-SRGNLLGRNSFEVRVCACPGRDRRIEEENFYKK-----------
>XP_012384546 22.3
SSSVPSQKEYPGDYNFRLGFLRSGTAKSVTC-TYSPILNKLFCQLAKTCPVQLWVNSPPP
PGARVRAMAVYKKSEHMTEVVRRCPHHERCSEHG----D------GL--APPQHLIRVEG
NLHAEYLDDINTFRHSVVVPYEMPEVGADCTTIHYNYMCNSSCMGGMNRRPILTIITLED
-SNGNLLGRRSFEVRVCACPGRDRRNEEDNFRKK-----------
>XP_021503848 6.3
SSFVPSHKTFQGNYGFRLGFLQSGTAKSVTC-TYSPSLNKLFCQLAKTCPVQLWVSSAPP
PGTRVRAMAIYKNSQHMTEVVRRCPHHERCSENEASDPR------GR--APPQHLIRVEG
NLHAEYVDDRQTFRHSVLVPYESPEVGSDCTTIHYNYMCNSSCMGGMNRRPILTIITLED
-PSGNLLGRNSFEVRVCACPGRDRRTEEENLRKK-----------
>XP_012868944 9.9
SSFVPSQNTYHGNYGFRLGFLQSGTAKSVTC-TYSPTLNKLFCQLAKTCPVQLWVDSTPP
PGTRVRAMAIYKKSQHMTEVVRRCPHHERCSD-N----D------GP--APPEHLIRVEG
NLHAEYLSDRHTYRHSVVVPYEPPEVGSDCTTIHYNYMCNSSCMGGMNRRPILTIITLED
-SSGKLLGRNSFEVRVCACPGRDRRTEEENFRRK-----------
>XP_027984161 19
SSSVPSQKTYPGSYGFHLGFLNSGTAKSVTC-TYSYTLNKLFCQMGKTCPVQLWVTSPPP
LNSRVRAMAIYKKSEHMTEVVRRCPHHERCTDYS----D------GL--APPQHLIRVEG
NSRAEYLDDKNTLRHSVVVPYEPPEVGSEYTTIHYNFMCNSSCMGGMNRRPILTIITLED
-SNGNLLGRDSFEVRICACPGRDRRTEEENFRKK-----------
>XP_028390486 9
SSCVPSQKTYPGSYDFHLGFLNSGTAKSVTC-TYSSTLNKLFCQLAKTCPVQLWVSSPPP
PGTRVRAMAIYKKSEHMTEVVRRCPHHERCSDYS----D------GL--APPQHLIRVEG
NSRAMYLEDKNTFRHSVVVPYETPEVGSDYTTIHYNFMCNSSCMGGMNRRPILTIITLED
SSSGNLLGRGSFEVRVCACPGRDRRTEEENFKKR-----------
>XP_024420872 29.2
SSCVPSQKTYPGSYDFHLGFLNSGTAKSVTC-TYSSTLNKLFCQLAKTCPVQLWVSSPPP
PGTCVRAMAIYKKSEHMTEVVRRCPHHERCSDYS----D------GL--APPQHLIRVEG
NSRATYLEDKNTFRHSVVVPYETPEVGSDCTTIHYNFMCNSSCMGGMNRRPILTIITLED
-SNGNLLGRDSFEVRVCACPGRDRRTEEENFRKK-----------
>XP_012862776 19
SSSVPSQKTYPGTYGFTLGFLNSGTAKSVTC-TYSPDLNKLFCQLAKTCPVQLWVTSPPP
PGTRVRTMAIYKKSEHMTEVVKRCPHHERCSDYI----D------AL--APPQHLIRVEG
NQRAEYLEDNVTLRHSVVVPYEPPEVGADCTTIHYNFMCNSSCMGGMNRRPILTIISLED
-TSGNLLGRNSFEVRICACPGRDRRTEEENFHKN-----------
>XP_022380348 27
SSFVPSPKTYPGAYGFRLGFLHSGTAKSVTC-TYSPSLNKLFCQLAKTCPVQLWVSSPPP
ADTCVRAMAIYKKSEFVTEVVRRCPHHERCLDSS----D------GL--APPQHLIRVEG
NLRAKYLDDRNTFRQSVVVPYEPPEVGSDCTTIHYNYMCNSSCMGGMNRRPILTIITLED
-SSGNVLGRSSFEVRVCACPGRDRRTEEENFRKK-----------
>XP_004760313 11.1
SSFVPSPKTYPGTYGFRLGFLHSGTAKSVTC-TYSPSLNKLFCQLAKTCPVQLWVSSPPP
ADTCVRAMAIYKKSEFVTEVVRRCPHHERCSDSS----D------GL--APPQHLIRVEG
NLRAKYLDDRNTFRQSVVVPYEPPEVGSDCTTIHYNYMCNSSCMGGMNRRPILTIITLED
-SSGNVLGRSSFEVRVCACPGRDRRTEEENFRKK-----------
>XP_023599701 34
SSSVPSPKTYPGSYGFRLEFLKSGTAKSVTC-TYSPMLNKLFCQMAKTCPVQLWVNSPPP
LSSRVRAMAIYKKSEHMTEVVRRCPHHERCSDYS----D------GL--APPHHLIRVEG
NLRAEYLDDPNTFRHSVVVPYEPPEVGSDYATIHYNFMCNSSCMGGMNRRPILTIITLED
-SNGNLLGRNSFEVRICACPGRDRRTEEENFRKKS----------
>XP_014405327 41
SSSVPSPKTYPGSYGFRLEFLKSGTAKSVTC-TYSPILNKLFCQMAKTCPVQLWVNSPPP
LSSRVRAMAIYKKSEHMTEVVRRCPHHERCSDYS----D------GL--APPHHLIRVEG
NLRAEYLDDPNTFRHSVVVPYEPPEVGSDYATIHYNFMCNSSCMGGMNRRPILTIITLED
-SNGNLLGRNSFEVRICACPGRDRRTEEENFRKK-----------
>XP_004594840 7
SFSVPSQNTYPGTYGFRLGFLQSGTAKSVTC-TYSPSLNKLFCQLAKTCPVQLKVDSTPP
PGTRVRAMAIYKKSQHVTEIVKRCPHHERCSD-S----D------GL--APPQHLIRVEG
NLRAEYLNDINTFRHSVVVPYEPPEVGSDCTTIHYNYMCNSSCMGGMNRRPILTIITLED
-SSGNVLGRDSFEVRVCACPGRDRRTEEENFHKK-----------
>XP_007523434 11.7
TSTVPSQQNYPGNYGFRLGFLQSGTAKSVTC-TYSPELNKLFCQLAKTCPVQLWVNSPPP
MGSHVRAMAIYKKSEHMTEVVRRCPHHER-SDCN----D------GL--APPQHLIRVEG
NMHAQYLDDEKTFRHSVVVPYELPEVGSDCTTVHYNFMCNSSCMGGMNRRPIVTIITLED
-SSGSLLGRGSFEVRVCACPGRDRRTEEDNLHKK-----------
>XP_020822126 22.1
SSTVPSRKDYPGEYGFRLGFLHSGTAKSVTC-TYSPELNKLFCQLAKTCPVQLWVTSPPP
AGARVRAMAIYKKSEHMTEVVKRCPHHERCTEHI----D------AL--APPQHLIRVEG
NLRAEYLNDATTMRQSVSIPYESPEVGCDCTTIHYNYMCNSSCMGGMNRRPILTIITLED
-SSGQLLGRRSFEVRVCACPGRDRRTEEENFRKK-----------
>XP_027712839 30
SSTVPSRKDYPGEYGFKLGFLHSGTAKSVTC-TYSPELNKLFCQLAKTCPVQLWVTSPPP
AGSRVRAMAIYKKSEHMTEVVKRCPHHERCTEHI----D------AL--APPQHLIRVEG
NLRAEYLNDATTMRQSVSIPYESPEVGCDCTTIHYNYMCNSSCMGGMNRRPILTIITLED
-SSGQLLGRRSFEVRVCACPGRDRRTEEENFRKK-----------
>XP_031821303 13
SSTVPSQKDYPGDYGFRLGFLQSGTAKSVTC-TYSPELNKLFCQLAKTCPVQLWVTSPPP
AGARVRAMAIYKKSEHMTEVVKRCPHHERCTEHK----D------AL--APPQHLIRVEG
NLRAEYLSDLTTKRQSVSVPYESPEVGCDYTTVHYNYMCNSSCMGGMNRRPILTIITLED
-SSGQLLGRRSFEVRVCACPGRDRRTEEENFRKK-----------
>XP_006261066 77
SSIVPSTEDYPGAHGFEVAFQPSGTAKSVTC-TYSPVLNKLFCQLARSCPVQVRVTQAPP
PGALIRAGAVYKKAEHVAEVVRRCPHHERSAEHS----D------GV--APAQHLIRVEG
NPQAQYCHDETTKRHSVTVPYTPPEVGSDSTTVLYNFMCNSSCMGGMNRRPILAILTLET
-KSGQLLGRCCFEVRICACPGRDRRTEEENLRNK-----------
>XP_024074382 138
SSTVPSTEDYAGEHGFELVFQQSGTAKSVTC-TYSPELNKLYCQLAKTCPVQIKTASQPP
PGSVVRATAVYKKSEHVAEVVRRCPHHERCEDNR----D------GV--APARHLIRIEG
NQQAHYYDDENTKRQSVMVPYETPQVGSDCTTVLYNFMCNSSCMGGMNRRPILAIITLEG
-RHGQLLGRRCFEVRVCACPGRDRRTEEENFRKK-----------
>NP_001118164 11
TSTVPTTSDYPGALGFQLRFLQSSTAKSVTC-TYSPDLNKLFCQLAKTCPVQIVVDHPPP
PGAVVRALAIYKKLSDVADVVRRCPHHQSTSENN----E------GP--APRGHLVRVEG
NQRSEYMEDGNTLRHSVLVPYEPPQVGSECTTVLYNFMCNSSCMGGMNRRPILTIITLET
-QEGQLLGRRSFEVRVCACPGRDRKTEEINLKKQ-----------
>XP_029525966 8
TSTVPTTSDYPGALGFQLRFLQSSTAKSVTC-TYSPDLNKLFCQLAKTCPVQIVVDHPPP
PGAVVRALAIYKKLSDVADVVRRCPHHQSTSENN----E------GP--APRGHLVRVEG
NQRSEYMEDRNTLRQSVLVPYEPPQVGSECTTVLYNFMCNSSCMGGMNRRPILTIITLET
-QEGQLLGRRSFEVRVCACPGRDRKTEEINLKKQ-----------
>XP_031663410 5
TSTVPTTSDYPGALGFQLRFLQSSTAKSVTC-TYSPDLNKLFCQLAKTCPVQIVVDHPPP
PGAVVRALAIYKKLSDVADVVRRCPHHQSTSENN----E------GP--APRGHLVRVEG
NQRSEYMEDGNTLRQSVLVPYEPPQVGSECTTVLYNFMCNSSCMGGMNRRPILTIITLET
-QDGQLLGRRSFEVRVCACPGRDRKTEEINLKKQ-----------
>XP_025050964 65
SSIVPSTEDYPGAHGFEVAFQPSGTAKSVTC-TYSPVLNKLFCQLAQSCPVQVRVAQAPP
PGAMIRAGAVYKKAEHVAEVVRRCPHHERSAEHS----D------GV--APAQHLIRVEG
NPQAQYCHDETTKRHSVTVPYTPPEVGSDSTTVLYNFMCNSSCMGGMNRRPILAILTLET
-KSGQLLGRRCFEVRICACPGRDRKTEEENLRNK-----------
>XP_029557503 38
TSTVPTTSDYPGALGFQLRFLQSSTAKSVTC-TYSPDLNKLFCQLAKTCPVQIVVDHPPP
PGAVVRALAIYKKLSDVADVVRRCPHHQSTSENN----E------GP--APRGHLVRVEG
NQRAEYMEDGNTLRQSVLVPYEPPQVGSECTTVLYNFMCNSSCMGGMNRRPILTIITLET
-QEGQLLGRRSFEVRVCACPGRDRKTEEINLKKQ-----------
>XP_005279396 61
SSTVPSTEDYAGEHGFELVFQQSGTAKSVTC-TYSLELNKLYCQLAKTCPVQIKTASQPP
PGSVVRATAVYKKSEHVAEVVRRCPHHERCEEYR----D------GV--APARHLIRIEG
NQQAHYYDDENTKRQSVTVPYETPQVGSDCTTVLYNFMCNSSCMGGMNRRPILAIITLEG
-RHGQLLGRRCFEVRVCACPGRDRRTEEDNFRKK-----------
>XP_018953143 47
TSSVPVATDYPGEHGFKLGFPQSGTAKSVTC-TYSSDLNKLFCQLAKTCPVQMLVDVAPP
QGSVIRATAIYKKSEHVADVVRRCPHHERTLD-G----D------GL--APPAHLIRVEG
NSRAVYREDDMTYRHSVVVPYEAPQLGAEWTTVLYNFMCNSSCMGGMNRRPILTIITLET
-HDGQLLGRRSFEVRVCACPGRDRKTEESNFRKD-----------
>XP_014051360 13
TSTVPTTSDYPGALGFQLRFLQSSTAKSVTC-TYSPDLNKLFCQLAKTCPVQIVVDHPPP
PGAVVRALAIYKKLSDVADVVRRCPHHQSTSENN----E------GP--APRGHLVRVEG
NQRAEYMEDGNTLRQSVLVPYEPPQVGSECTTVLYNFMCNSSCMGGMNRRPILTIITLET
-QEGQLLGRRSFEVRVCACPGRDRKTEEINLKKQ-----------
>XP_024250651 9
TSTVPTTSDYPGALGFQLRFLQSSTAKSVTC-TYSPDLNKLFCQLAKTCPVQIVVDHPPP
PGAVVRALAIYKKLSDVADVVRRCPHHQSTSENN----E------GP--APRGHLVRVEG
NQRSEYMEDGNTLRQSVLVPYEPPQVGSECTTVLYNFMCNSSCMGGMNRRPILTIITLET
-QEGQLLGRRSFEVRVCACPGRDRKTEEINLKKQ-----------
>NP_001081567 30.3
SCAVPSTDDYAGKYGLQLDFQQNGTAKSVTC-TYSPELNKLFCQLAKTCPLLVRVESPPP
RGSILRATAVYKKSEHVAEVVKRCPHHERSVEPG----E------DA--APPSHLMRVEG
NLQAYYMEDVNSGRHSVCVPYEGPQVGTECTTVLYNYMCNSSCMGGMNRRPILTIITLET
-PQGLLLGRRCFEVRVCACPGRDRRTEEDNYTKK-----------
>NP_990595 30
SPVVPSTEDYGGDFDFRVGFVEAGTAKSVTC-TYSPVLNKVYCRLAKPCPVQVRVGVAPP
PGSSLRAVAVYKKSEHVAEVVRRCPHHERCGGGT----D------GL--APAQHLIRVEG
NPQARYHDDETTKRHSVVVPYEPPEVGSDCTTVLYNFMCNSSCMGGMNRRPILTILTLEG
-PGGQLLGRRCFEVRVCACPGRDRKIEEENFRKR-----------
>XP_023823892 40
TSTVPTTSDYPGALGFQLRFLQSSTAKSVTC-TYSPDLNKLFCQLAKTCPVQIVVDHPPP
PGAVVRALAIYKKLSDVADVVRRCPHHQSTSENN----E------GH--APRGHLVRVEG
NQRAEYMEDGNTLRQSVLVPYEPPQVGSECTTVLYNFMCNSSCMGGMNRRPILNIITLET
-QEGQLLGRRSFEVRVCACPGRDRKTEEINLKKQ-----------
>XP_026066397 41
TASVPVATDYPGEHGFKLGFPQSGTAKSVTC-TYSSDLNKLFCQLAKTCPVQMMVDVAPP
QGSVVRATAIYKKSEHVAEVVRRCPHHERTPD-G----D------GL--APAAHLIRVEG
NSRALYREDEVNLRHSVVVPYEAPQLGAEFTTVLFNFMCNSSCMGGMNRRPILTIITLET
-HDGQLLGRGSFEVRVCACPGRDRKTEESNFRKD-----------
>NP_001258749 5.5
TSTVPETSDYPGDHGFRLRFPQSGTAKSVTC-TYSPDLNKLFCQLAKTCPVQMVVDVAPP
QGSVVRATAIYKKSEHVAEVVRRCPHHERTPD-G----D------NL--APAGHLIRVEG
NQRANYREDNITLRHSVFVPYEAPQLGAEWTTVLLNYMCNSSCMGGMNRRPILTIITLET
-QEGQLLGRRSFEVRVCACPGRDRKTEESNFKKD-----------
>XP_010866226 30
TSSVPTTSDYPGTHGFQLRFLQSSTAKSVTC-TYSSCLNKLFCQLAKTCPIQMVVDHPPP
PGAVVRALAIYKKLSDVADVVRRCPHHQSTSENN----E------GP--APRGHLIRVEG
NQRAEYIEDRSTQRQSVVVPYEPPQVGSECTTVLYNFMCNSSCMGGMNRRPILTIITLET
-LDGQLLGRCSFEVRVCACPGRDRKTEEINLKKQ-----------
>XP_015196219 18
-------------------------AKSVTC-TYSPDLNKLYCQLAKTCPVQIFVSNPPP
MGALIRAMAVYKKSEHVADVVRRCPHHERAPENN----E------GP--APPGHLIRVEG
SQMAQYMEDGNTRRQSVLVPYESPQLGSECTTVLYNFMCNSSCMGGMNRRPILTIITLET
-KEGQLLGRRCFEVRVCACPGRDRKTEEENFHKQ-----------
>XP_030647985 15
SSTVPTTTDYPGTHGFHLRFQQTSTAKSVTC-TYSSELNKLYCQLAKTCPVQMVVDVLPP
AGAMLRATAVYKKSEHVAEVVRRCPHHERTPENN----E------GP--APPGHLIRVEG
NARAVYQEDCHTRRQSVLVPYEPPQLGSECTTVLYNYMCNSSCMGGMNRRPILTIITLET
-QEGALLGRRCFEVRVCACPGRDRRTEEGNYRKL-----------
>XP_027686592 75
SSTVPSTEDYAGEHGFELTFQQSGTAKSVTC-TYSPELNKLFCQLAKTCPVQIKMASQPP
PGSIVRATAVYKKSEHVAEVVRRCPHHERCMEYS----D------GV--APARHLIRIEG
NQQAHYHDDENTKRQSVTVPYETPQVGSDCTTVLYNFMCNSSCMGGMNRRPILAIITLEG
-KHGQLLGRRCFEVRVCACPGRDRRTEEENFQKK-----------
>XP_026112489 41
TASVPVATDYPGEHGFKLGFPQSGTAKSVTC-TYSSDLNKLFCQLAKTCPVQMLVDVAPP
QGSVIRATAIYKKSEHVAEVVRRCPHHERTPD-G----D------VL--APPAHLIRVEG
NSLAVYREDDITHRHSVAVPYEAPQLGAEWTTVLYNFMCNSSCMGGMNRRPILTIITLET
-HEGQLLGRRSFEVRVCACPGRDRKTEESNFGKD-----------
>XP_026854214 12.6
ASTVPVTTDYPGAYDFTLRFQQSSTAKSVTC-TYSPDLNKLFCQLAKTCPVQMEVNSLPP
LGAVLRATAVYKKSEHVAEVVRRCPHHEKTQETN----N------GL--APPGHLLRVEG
NSRAIYQEDDNTLRHSVLVPYEPPQVGSECTTVLYNYMCNSSCMGGMSRRPILTIITLET
-QDGQLLGRRSFEVRVCACPGRDRKIEESNFKKQ-----------
>NP_001187005 16
TSTVPVTSDYPGLLNFTLHFQESSGTKSVTC-TYSPDLNKLFCQLAKTCPVLMAVSSSPP
PGSVLRATAVYKRSEHVAEVVRRCPHHERSNDSS----D------GP--APPGHLLRVEG
NSRAVYQEDGNTQAHSVVVPYEPPQVGSQSTTVLYNYMCNSSCMGGMNRRPILTIITLET
-QDGHLLGRRTFEVRVCACPGRDRKTEESNFKKQ-----------
>XP_028973560 30
ASTVPSTVDYPGEHGFQLRFQKSGTAKSVTS-TFSAQLNKLYCQLAKTCPVEVLMLNEPP
PGAILRATAIYKKSEHVSEVVRRCPHHQSAPEYN----E------GV--NHRSHLIRVEG
SQRVQYLEDENTKRQSVVLPYEPPQLGSEVTTVLLNFMCNSSCMGGMNRRPILTILTLET
-AEGQVLGRRCFEVRVCACPGRDRKSEEENAAKS-----------
>XP_030330235 60
----------MGSYGVLWG------AMGLRCPQFSVVLHKLFCRLAKPCPVQVWVGVPPP
PGALLRAVAVYKKSEHVAEVVRRCPHHERCGGGS----D------GL--APPQHLIRVEG
NPQARYHDDETTKRHSVTVPYEPPEVGSDCTTVLYNFMCNSSCMGGMNRRPILAILTLEG
-PAGQVLGRRCFEVRVCACPGRDRRIEEENHRRR-----------
>XP_031440929 22
ATTVPSPTDYPGELGFCVRFTQFSTAKSATS-TFSQKLNKLFCQLAKTCPVEVLVDHEPP
MGAILRATAIYKKSDHVADVVLRCPHHQNIAENN----E------GV--AYRSHLIRIEG
TQRAQYLEDCVTRRQSVMVPYERPQLGSEATTILLNYMCNSSCMGGMNRRPILTILTLET
-QEGRVLGRRCFEVRVCACPGRDRKSEEESNGK------------
>XP_030117764 12
------------------------MAKSVTC-TYSPSLNKLFCRLAKPCPVQVRVGVPPP
PGALLRAVAVYKKAEHVAEVVRRCPHHERC--GT----D------GN--APAQHLIRVEG
NPQARYQDDETTKRHSVAVPYEPPEVGSECTTVLYNFMCNSSCMGGMNRRPILTILTLEG
-PGGQILGRRCFEVRVCACPGRDRRHEEETQRKG-----------
>XP_008123458 7.2
TPIIPSTEDYVGDHGFELAFEQSGTAKSVTC-TYSPKLNKLFCQLAKTCPVHIKVANMPP
LGAVIRTMAVYKKSEHVAEVVKRCPHHERSQEFS----D------SS--APAEHLIRVEA
NQQARYIADPN-RRHSVIVPYEPPQVGTDNTTLLLNFMCNSSCMGGMNRRAILAIITLET
-LQGDLLGRRCFEVRVCACPGRDRKSEEENALKAAVPKGKSKKVV
>XP_008433633 5
APMVPAISNYAGELDFALRFSESGTAKSVTS-TFSEKLTKLFCQLAKTTPIGILVKEEPP
QGAVIRATAVYKKTEHVAEVVKRCPHHQ----SE----D------AS--DNKSHLIRVEG
SQLAQYFEDPNTKRQSVTVPYERPQRGSEMTTILLSFMCNSSCMGGMNRRPILAILTLET
-TEGEVLGRRCFEVRVCACPGRDRKTEEENLEK------------
>XP_030194050 25
APTVPTTSDYAGEYGFHIRFQNSGTAKSVTS-TYSVSLNKLFCQLAKTCPVEVLVDGAPP
PGAILRATAVYKKTEHVADVVRRCPHHL----KE----D------AV--EHRSHLIRVEG
SQRAQYMEDPNTKRQSVTLPYEAPQLGSGHTTLLLNFMCNSSCMGGMNRRAILTILTLES
-SEGHVLGRRCFEVRVCACPGRDRKTEEGNVEKK-----------
>XP_028419533 12
ASTVPVTTDYPGEYGFQLRFQKSGTAKSVTS-TYSEVLNKLYCQLAKTSPVEVLVSKELP
PGAVLRATAVYKKTEHVAEVVRRCPHHQ----NE----D------GA--EHRSHLIRVEG
SQRAQYFEDPHTKRQSVTVPYEPPQLGSEITTILLSYMCNSSCMGGMNRRPILTILTLET
-PEGLVLGRMCFEVRVCACPGRDRKTEEENSTKM-----------
>XP_028607835 10
TSAVPSTENYPGEHGFELAFEPSGTAKSVTC-TYSPDLNKLYCQMGKTCPVLIKVTTPPP
PWAVIRTTAIFKKSEHIAEVVKRCPHHERSGEGSR---G------GI--APAEHLIRVEG
NLQAQYLSDQNTKRHSVVVPYEAPQLGTESSKILYNFMCNSSCQGGMNRRPILIIITLET
-HLGQLLGRRCFEARVCACPGRDRKTEEENFKKM-----------
>XP_025761189 9
ASTVPVTTDYPGECGFQLRFQKSGTAKSVTS-TYSEVLNKLYCQLAKTSPIEVLVSKEPP
QGAVLRATAVYKKTEHVADVVRRCPHHQ----NA----D------SA--EHRSHLIRVEG
NQRAQYFEDRHTKRHSVTVPYEPPQLGSEMTTILLSFMCNSSCMGGMNRRPILTILTLES
-PEGLVLGRRCFEVRVCACPGRDRKTEEDNKQKK-----------
>XP_020484796 29
ASTVPVTSDYPGDFDFQLRFRKSGTAKSVTS-TYSELLNKLYCQLAKTNPIEILVSREPP
AGAMIRATAVYKKTEHVAEVVRRCPHHQ----NE----DRKDNPSAA--ENSSHLIRVEG
SERAQYFEDVNTKRQSVTVPYEAPQLGSEMSTVLLRFMCNSSCMGGMNRRPILTILTLET
-PEGHVLGRQCFEVRICACPGRDRKTEEENSTKM-----------
>XP_030287523 11
SSTVPVTTDYPGEYDFQLRFQISGTAKSVTS-TYSELLNKLYCQLAKTSPVEVVVSKEPP
AGAVLRATAVYKKTEHVAEVVRRCPHHQ----NE----D------AA--EHRSHLIRVEG
SQRAQYFEDQHTKRQSVTVPYEPPQLGSEITTILLSFMCNSSCMGGMNRRPILTILTLET
-PEGVVLGRRCFEVRVCACPGRDRKTEEQNSAKT-----------
>XP_028998159 2
SSTVPVTTDWPGECDLELRFQKSGTAKSVTS-TYSPELNKLYCQMEKTSPVEILVTKEPP
HGAVLRVMAVYKKTEHLADVVRRCPHHQ----NG----D------GK--ESVYHLIRVEG
SQRPQYLEDYNTKRHSVTVPYEPPQPGSEITTILLSFMCNSSCMGGMNRRPILTILTLET
-SDGQLLGRRCFEVRVCACPGRDRKTEEANSAKL-----------
>XP_026546206 14.1
SCVFPFAEDYPGQFGFNLEFEPSGTAKSVTY-TFSPSLNKLFCQMGKTCKVLVKMTGVPP
SGSVVRAMAVYKRSEHMAEVVRRCPHHER--EHN----D------EA--IPADHLIRVEG
NLQAFYHTHPTTNRHSVLVPYQKPQVGMACTIILYNYMCNSSCMGGMNRRPIQTILTLET
-AQGEVLGRRCFDVRVCACPGRDRRMEEYTQQKA-----------
>XP_026209016 8
SSTVPVTTDYPGEYGFQLRFQKSGTAKSVTS-TFSELLNKLYCQLAKTSPVEVLVSKKPP
QGAVLRATAVYKKTEHVADVVRRCPHHQ----NE----D------SA--EHRSHLIRVEG
NQRAQYFEDPHTQRQSVTVPYEPPQLGSEMTTILLSFMCNSSCMGGMNRRPILTILTIET
-PEGEVLGRRCFEVRVCACPGRDRKTEEENSTKT-----------
>XP_013907681 14
SCVFPPTEDHAGQFDFDLEFEKSGTAKSVTY-TYSPELNKLYCQMCKTCKVLVKTSGTPP
LGSVIRAMAVYKQSEHMAEVVRRCPTHERQPMHN----D------EV--TPADHLIRVEG
NPQARYYTDPATKRHSVCVPYQKPQVGMACSIILYNYMCNSSCMGGMNRRPIIAILTLET
-SHGEILGRRCFEVRICACPGRDRRSEEQAKEKA-----------
>XP_005999860 48
TSSVPSTEDYAGDHNFQLIFQQSSTAKSVTC-TYSFTLNKLFCQLAKTCPVQIKVDAAPP
PGALIRTIAIYKKSEHIAEVVRRCPHHERCADLN----D------GL--APASHLIRVEG
NRLAQYIEDRNTQRQCVIIPYECPQVGSECSTVLYNFMCNSSCMGGMNRRPILTIITLET
-KEGRLLGRRCFEVRVCACPGRDRKTEEENSHKQ-----------
>AEW46988 6
TSAVPSITDYAGPHNFQLLFQQFSTAKSVTN-TYSTSLTKLFCQIAKTCPIQVKVSSPPP
PGSVIRATAVYKKSEHVAEVVKRCPHHERCPDFN----D------GL--APPSHLIRVEA
NSLARYHDDEHSKRQSVVLPYEEPQVGSECSTVLYNYMCNSSCMGGMNRRPILTIITLET
-PDGRLVGRRCFEVRVCACPGRDRRYEEENQRKQ-----------
>ABI33869 17
TSAVPSTEDYPGAYDFKLVFQQSGTAKSVTC-TYSPDLNKLFCQLAKTCPVQMTVSSPPP
PGAILRATAVYKKSQHVAEVVKRCPHHERTVDPN----D------DSVPVPADHLIRVEG
NFRAEYKMNSTTHRHSVVVPYETPQLGSGCTTVLYNYMCNSSCMGGMNRRPILTIITLET
-SDEQLLGRRCFEVRVCACPGRDRKTEEENFHNK-----------
>Proteusanguinus 102
TSAVPSTEDYPGTYDFKLTFQQSGTAKSVTC-TYSPDLNKLFCQLAKTCPVQMTVSTPPP
PGAIIRASAVYKKSQHVADVVKRCPHHERVGDPS----D------ELSRAPASHLIRVEG
NFYAQYHENQTTHRHSVMVPYENPQVGSDCTTVLYNYMCNSSCMGGMNRRPILTIITLET
-SEGQLLGRRCFEVRVCACPGRDRKTEEENFQNK-----------
>Sphenodonpunctatus 90
SSTVPSTEDYAGNHDFGLAFKQSGVAKSVTC-TYSPELNKLFCQLAKTCPVLIRVASQPP
PGAIIRAMAVYKKTEHVAEVVKRCPHHERSLEAG----D------GL--APAQHLIRVEG
SQKAQYRDDEHTKRHSVIVPYEAPQVGSDCSTVLYNFMCNSSCMGGMNRRPILTIITLET
-QQGQLLGRRCFEVRVCACPGRDRKTEEENFQKK-----------
>Balaenamysticetus 211
SSFVPSQKTYPGSYGFRLGFLHSGTAKSVTC-TYSPALNKLFCQLAKTCPVQLWVSSPPP
PGTRVRAMAIYKKSEYMTEVVRRCPHHERCSDYS----D------GL--APPQHLIRVEG
NLRAEYLDDRNTFRHSVVVPYEPPEVGSDCTTIHYNFMCNSSCMGGMNRRPILTIITLED
-SNGNLLGRNSFEVRVCACPGRDRRTEEENFHKK-----------
